# Supplementary material
Source: Elsevier journal article supplement (https://www.sciencedirect.com/science/article/pii/S1699258X16300572)
Supplement: mmc1 [file S1699258X16300572:mmc1.pdf]

**Tabla 1 Suplementaria.** Fármacos biosimilares aprobados en Europa desde 2006.

| <b>PRODUCTO COMERCIAL</b>          | <b>SUSTANCIA ACTIVA</b> | <b>FECHA DE AUTORIZACION</b>                           | <b>FABRICANTE</b>                   |
|------------------------------------|-------------------------|--------------------------------------------------------|-------------------------------------|
| <b>Omnitrope®</b>                  | Somatropina             | 12 de Abril de 2006                                    | Sandoz GmbH                         |
| <b>Valtropin®</b>                  | Somatropina             | 24 de Abril de 2006<br>(retirado en Mayo 2012)*        | BioPartners GmbH                    |
| <b>Abseamed®</b>                   | Epoetina alfa           | 28 de Agosto de 2007                                   | Medice Arzneimittel<br>Pütter GmbH  |
| <b>Binocrit®</b>                   | Epoetina alfa           | 28 de Agosto de 2007                                   | Sandoz GmbH                         |
| <b>Epoetin alfa hexal®</b>         | Epoetina alfa           | 28 de Agosto de 2007                                   | Hexal AG                            |
| <b>Retacrit®</b>                   | Epoetina zeta           | 18 de Diciembre de 2007                                | Hospira UK Limited                  |
| <b>Silapo®</b>                     | Epoetina zeta           | 18 de Diciembre de 2007                                | Stada Arzneimittel AG               |
| <b>Biograstim®</b>                 | Filgrastim              | 15 de Septiembre de 2008                               | AbZ-Pharma GmbH                     |
| <b>Ratiograstim®</b>               | Filgrastim              | 15 de Septiembre de 2008                               | Ratiopharm GmbH                     |
| <b>Filgrastim<br/>ratiopharm®</b>  | Filgrastim              | 15 de Septiembre de 2008<br>(retirado en Julio 2011)** | Ratiopharm GmbH                     |
| <b>Tevagrastim®</b>                | Filgrastim              | 15 de Septiembre de 2008                               | Teva GmbH                           |
| <b>Filgrastim hexal®</b>           | Filgrastim              | 6 de Febrero de 2009                                   | Hexal AG                            |
| <b>Zarzio®</b>                     | Filgrastim              | 6 de Febrero de 2009                                   | Sandoz GmbH                         |
| <b>Nivestim®</b>                   | Filgrastim              | 8 de Junio de 2009                                     | Hospira UK Limited                  |
| <b>Somatropin<br/>Biopartners®</b> | Somatropina             | 5 de Agosto de 2013                                    | BioPartners GmbH                    |
| <b>Inflectra®</b>                  | Infliximab              | 10 de Septiembre de 2013                               | Hospira UK Limited                  |
| <b>Remsima®</b>                    | Infliximab              | 10 de Septiembre de 2013                               | Celltrion Healthcare<br>Hungary Kft |
| <b>Ovaleap®</b>                    | Folitropin alfa         | 27 de Septiembre de 2013                               | Teva Pharma BV                      |
| <b>Grastofil®</b>                  | Filgrastim              | 18 de Octubre de 2013                                  | Apotex Europe BV                    |
| <b>Bemfola®</b>                    | Folitropin alfa         | 27 de Marzo de 2014                                    | Finox                               |
| <b>Abasaglar®</b>                  | Insulina glargina       | 9 de Septiembre de 2014                                | Lilly                               |

**Fuente:** EMA (European Medicines Agency). \*Retirado a petición del fabricante por razones comerciales [14]; \*\*Retirado a petición de la empresa fabricante [15].
